# Supplementary material for: Autism risk gene Cul3 alters neuronal morphology via caspase-3 activity in mouse hippocampal neurons
Source: PubMed Central journal article supplement (PMC11129687; doi:10.3389/fncel.2024.1320784), 2024-05-09
Supplement: Data_Sheet_1.pdf [file Data_Sheet_1.pdf]

## Supplementary material

### Autism Risk Gene *Cul3* Alters Neuronal Morphology via Caspase-3 Activity in Mouse Hippocampal Neurons

Qiang-qiang Xia<sup>1</sup>, Anju Singh<sup>1</sup>, Jing Wang<sup>1</sup>, Zhong Xin Xuan<sup>1</sup>, Jeffrey D. Singer<sup>2</sup>, Craig M. Powell<sup>1\*</sup>

<sup>1</sup>Department of Neurobiology, Marnix E. Heersink School of Medicine & Civitan International Research Center, University of Alabama at Birmingham, Birmingham, AL, United States.

<sup>2</sup>Department of Biology, Portland State University, Portland, OR, United States.

\*Corresponding author: Craig M. Powell ([craigpow@uab.edu](mailto:craigpow@uab.edu)).

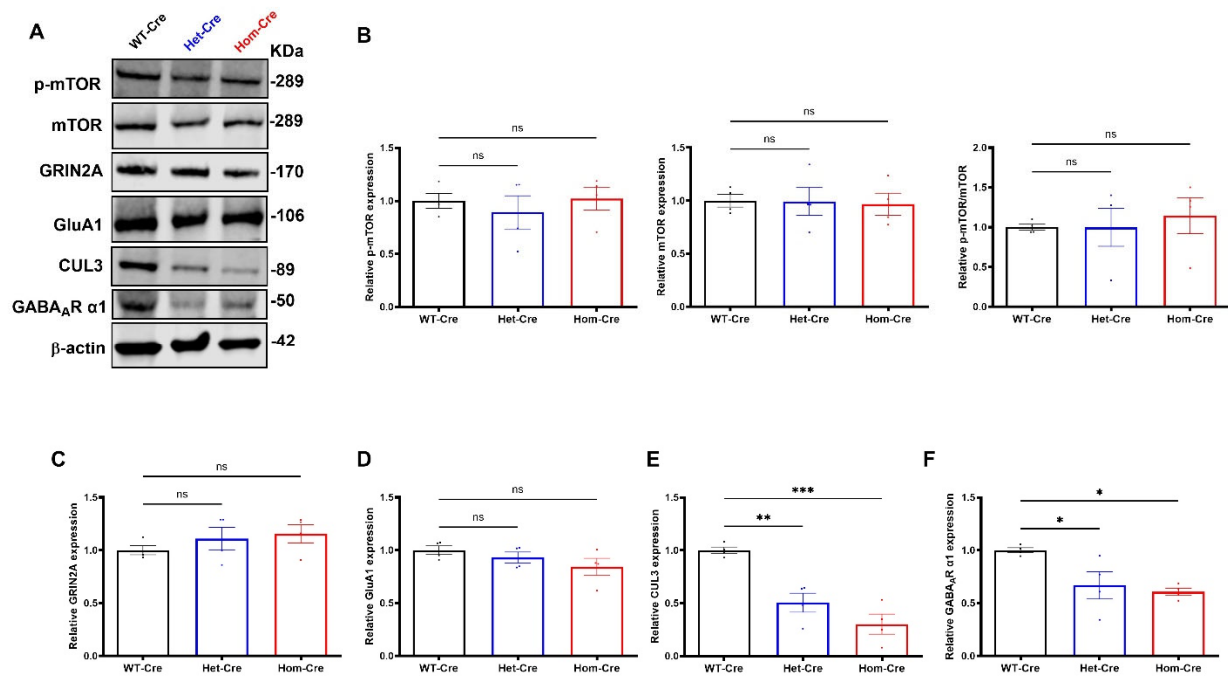

**Fig.S1. *Cul3* homozygous deletion and heterozygous reduction decrease GABA<sub>A</sub> receptor but not ionotropic glutamate receptor expression in primary cultured hippocampal neurons.**

(A-F) Representative immunoblots (A) and graph of group data (B-F) for anti-p-mTOR, anti-mTOR, anti-GRIN2A, anti-GluA1, anti-CUL3, anti-GABA<sub>A</sub>R  $\alpha$ 1 and anti- $\beta$ -actin blots following AAV-Cre-GFP (WT-Cre, Het-Cre, Hom-Cre) transduction in cultured *fCul3* hippocampal neurons. \*P<0.05, \*\*P<0.01, \*\*\*P<0.001, \*\*\*\*P<0.0001, ordinary one-way ANOVA with Dunnett's multiple comparisons test; bars represent mean  $\pm$  SEM, 4 separately derived neuronal cultures.

**Data Availability Statement:** The data set analyzed in this paper is available at the GIN repository (<https://doi.org/10.12751/g-node.bh6pvf>).
